# Supplementary material
Source: Springer Nature journal article supplement (https://www.springermedizin.de/resource/supplementary/13054_2010_8454_MOESM1_ESM.pdf/9732000)

Spearman's  $r=0.46$ ,  $p=0.01$

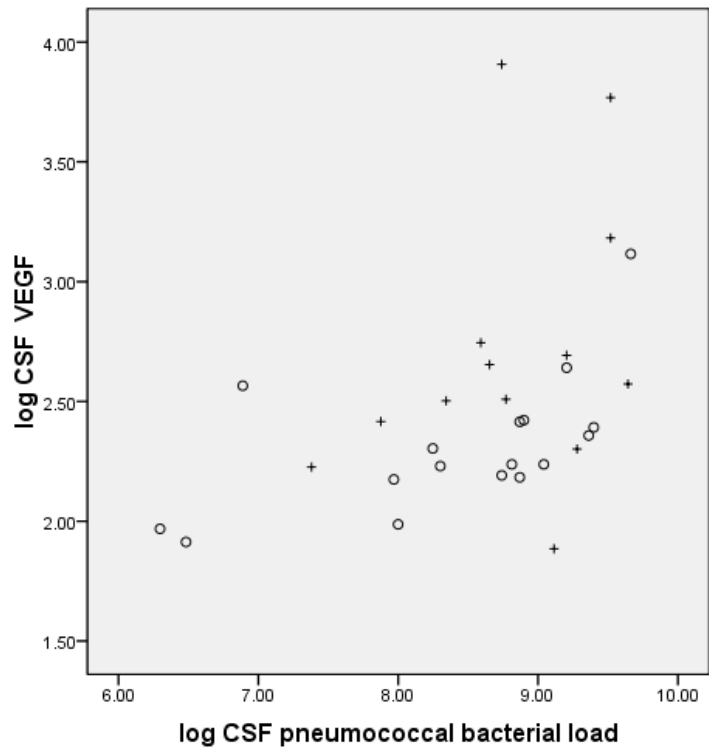

Spearman's  $r=0.55$ ,  $p=0.02$

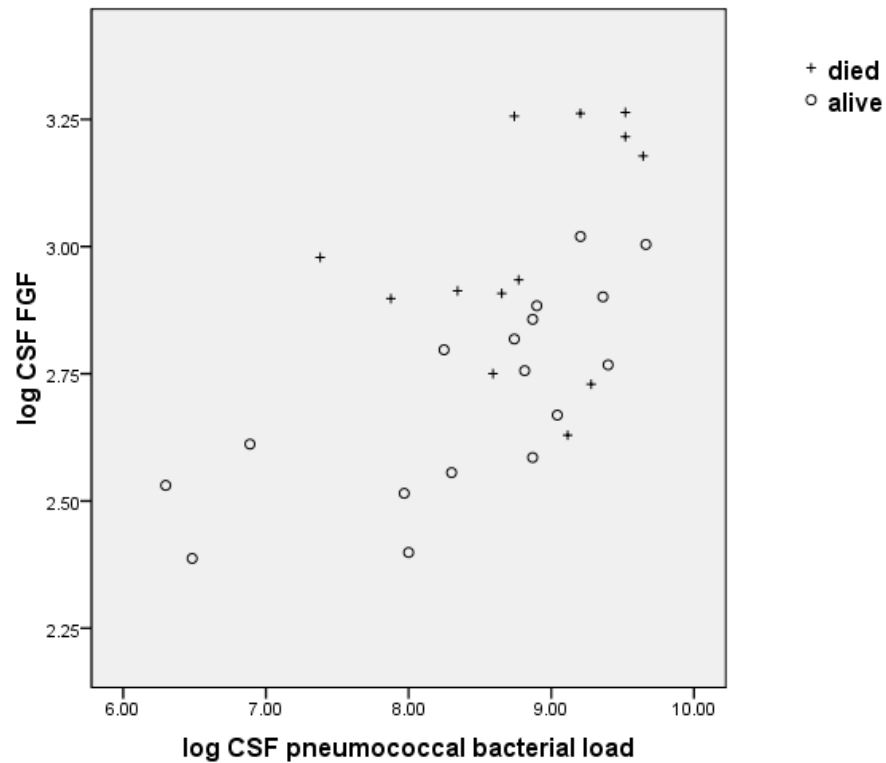

Supplement: MOESM1 [file 9732000]
